# Supplementary material
Source: PubMed Central journal article supplement (PMC8649198)
Supplement: sj-pdf-1-neu-10.1177_19714009211017782.pdf [file sj-pdf-1-neu-10.1177_19714009211017782.pdf]

# SUPPLEMENTAL MATERIAL

## High-Resolution Vessel Wall Imaging After Mechanical Thrombectomy

### Supplemental Figures

#### Supplemental Figure I.

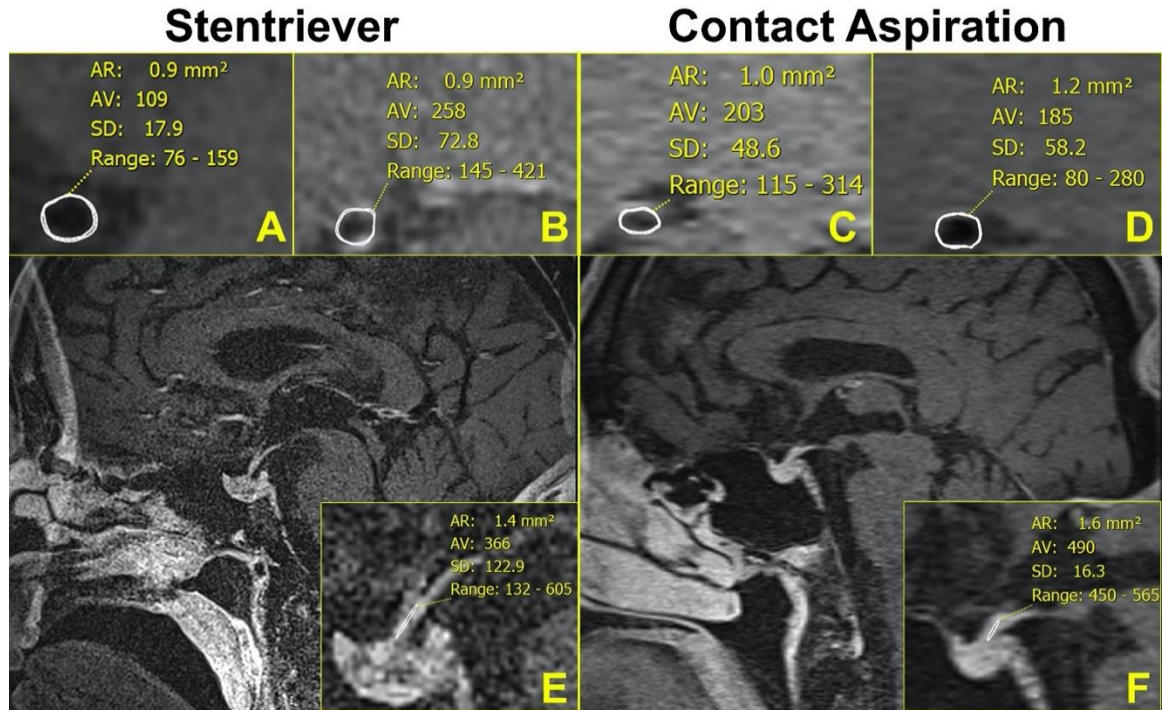

**Supplemental Figure I.** Vessel wall analysis. The CR is calculated by utilizing the maximum SI of the cross-sectional ROI divided by the maximum SI of the pituitary stalk (E and F). *Stentriever*: Reference vessel (A)  $CR = 159/605 = 0.26$ , and target vessel (B)  $CR = 421/605 = 0.7$ . *Contact Aspiration*: Reference vessel (C)  $CR = 314/565 = 0.56$ , and target vessel (D)  $CR = 280/565 = 0.50$

## **Supplemental Tables**

**Supplemental Table I.** Technical parameters for HR-VWI acquisition in a 3T Siemens Magnetom Skyra MRI scanner (20-channel head coil).

| <b>Parameter</b>     | <b>3D T1 SPACE</b> | <b>T2 SPACE</b> | <b>CE-MRA</b>   | <b>SWI</b>      |
|----------------------|--------------------|-----------------|-----------------|-----------------|
| TR (msec)            | 900                | 2000            | 3.3             | 27              |
| TE (msec)            | 15                 | 249             | 1.28            | 20              |
| Flip angle           | variable           | variable        | 25              | 15              |
| Bandwidth (Hz/pixel) | 446                | 460             | 590             | 160             |
| FOV (mm)             | 200 x 200          | 180             | 223 x 195       | 240 x 180       |
| Matrix (mm)          | 320 x 320          | 320 x 320       | 252 x 284       | 256 x 184       |
| Voxel size (mm)      | 0.6 x 0.6 x 0.6    | 0.6             | 0.6 x 0.6 x 0.8 | 0.9 x 0.9 x 2.4 |
| Slice thickness (mm) | 0.63               | 0.56            | 0.8             | 2.4             |
| ETL                  | 52                 | 106             | 0               | ---             |
| Acquisition time     | 6:44               | 8:50            | 0:15            | 3:03            |

CE-MRA: contrast-enhanced MRA; ETL: echo train length; FOV: field of view; TE: echo time; TR: response time.

**Supplemental Table 2.** Clinical characteristic per group

|                                             | <b>Use of Stentriever<br/>N=16</b> | <b>Contact Aspiration<br/>Only<br/>N=4</b> | <b>P</b> |
|---------------------------------------------|------------------------------------|--------------------------------------------|----------|
| <b>NIHSS Admission</b>                      | 17.5±8.7                           | 14.5±9.5                                   | 0.55     |
| <b>IV tPA</b>                               | 6(38%)                             | 2(50%)                                     | >0.99    |
| <b>ASPECT</b>                               | 9±1.1                              | 8.8±1.5                                    | 0.83     |
| <b>LKW to recanalization (Minutes)</b>      | 570±343                            | 415±235.9                                  | 0.41     |
| <b>Puncture to recanalization (Minutes)</b> | 56.5±48.1                          | 17.5±8.2                                   | 0.13     |
| <b>Retrieval attempts</b>                   | 2.9±1.9                            | 1.5±0.6                                    | 0.24     |
| <b>Success Rate (TICI score &gt;2b)</b>     | 15(93%)                            | 4(100%)                                    | >0.99    |
| <b>Complications</b>                        | 1(6%)                              | 0                                          | >0.99    |
